# Supplementary material
Source: Springer Nature journal article supplement (https://www.springermedizin.de/resource/supplementary/12890_2012_380_MOESM3_ESM.pdf/9505256)

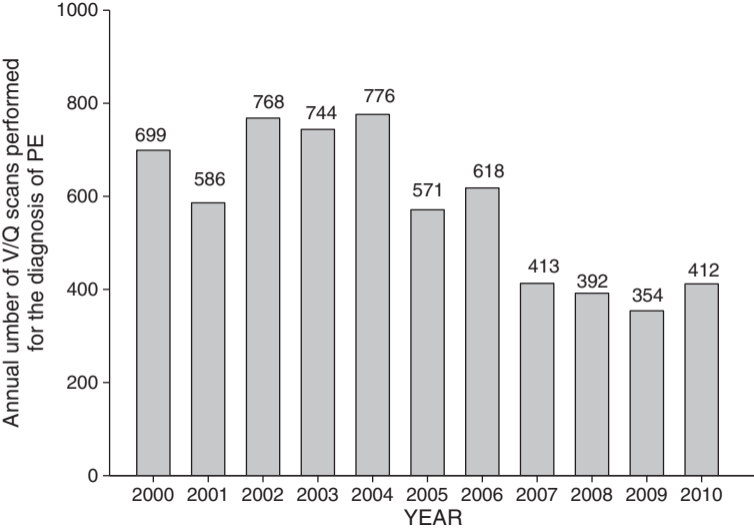

Supplement: MOESM3 [file 9505256]
